# Supplementary material for: Effectiveness of Rapid Verbal Persuasion to Promote Influenza Vaccination: A Randomized Controlled Trial
Source: Research Square preprint supplement (doi:10.21203/rs.3.rs-5828050/v1), 2025-02-04
Supplement: Supplementary file 1 [file b3207b92638a64cf7f0f5467.docx]

Mechanisms, Development, and Validation of Brief Verbal Intervention in Promoting Influenza Vaccination Uptake

| Academic program: |  | Social Medicine and Health Care Management |
| --- | --- | --- |
| Field of research: |  | Implementation of science, health management and services |
| Sources: |  | Optional (international topics of the Swiss Agency for Development and Cooperation) |
| Project leader: |  | Huanyuan Luo, Xiaoshan Chen |
| Institutions responsible for the subject |  | Dermatology Hospital of Southern Medical University, |
|  | School of Health Management, Southern Medical University |

**Contents**

[I. Title of the project (including sub-topics) 1](#_Toc187763982)

[II. Rationale for the project 1](#_Toc187763983)

[(i) Significance of the study 1](#_Toc187763984)

[1. Influenza poses a serious threat to public health and a heavy burden on the economy. 1](#_Toc187763985)

[2. Influenza vaccination is the most cost-effective measure to prevent influenza 2](#_Toc187763986)

[3. Flu vaccination dilemma to be resolved 2](#_Toc187763987)

[(ii) Current status and analysis of China and international research 3](#_Toc187763988)

[1. Factors affecting vaccination and the theoretical model of vaccine hesitancy 3](#_Toc187763989)

[2. Interventions to improve influenza vaccination 4](#_Toc187763990)

[Key references: 5](#_Toc187763991)

[III. Research objectives, research content indicators, technical routes and key issues to be addressed 8](#_Toc187763992)

[(i) Research objectives 8](#_Toc187763993)

[(ii) Content of the study 8](#_Toc187763994)

[1. Exploring the influencing factors of influenza vaccination in China based on the "3C" model theory 8](#_Toc187763995)

[2. Developing Brief Verbal Intervention implementation strategy adapted to China context 9](#_Toc187763996)

[3. Validating Brief Verbal Intervention implementation strategy adapted to primary care settings in China 10](#_Toc187763997)

[(iii) Key issues to be addressed 11](#_Toc187763998)

[IV. Proposed research program and feasibility analysis. 12](#_Toc187763999)

[(i) Research program 12](#_Toc187764000)

[1. Mechanism sorting: forming a set of factors influencing influenza vaccination in China 12](#_Toc187764001)

[2. Intervention development: Brief Verbal Intervention implementation strategy and line programs 15](#_Toc187764002)

[3. Validation of effects: conducting a two-arm randomized controlled trial 17](#_Toc187764003)

[(ii) Research methodology 23](#_Toc187764004)

[1. Semi-structured interviews 24](#_Toc187764005)

[2. Non-participatory observation 25](#_Toc187764006)

[3. Questionnaire and Scale Survey 25](#_Toc187764007)

[4. Two-group randomized controlled trial 26](#_Toc187764008)

[(iii) Feasibility analysis 26](#_Toc187764009)

[V. Features and innovations of the project 27](#_Toc187764010)

[VI. Indicators expected to be met by the study 28](#_Toc187764011)

[1. Theoretical refinement 28](#_Toc187764012)

[2. Academic conference 28](#_Toc187764013)

[3. Academic paper 29](#_Toc187764014)

[VII. Supporting conditions for research 29](#_Toc187764015)

[(i) Research conditions 29](#_Toc187764016)

[(ii) Project workload 30](#_Toc187764017)

[(iii) Requirements 31](#_Toc187764018)

[Appendix I List of issues to be identified for pre-testing 33](#_Toc187764019)

[Appendix II Data collection form for medical personnel 34](#_Toc187764020)

[Appendix III Data collection form for vaccinated persons 38](#_Toc187764021)

[Appendix IV Informed consent 44](#_Toc187764022)

[Appendix V Outline of medical staff interviews 48](#_Toc187764023)

**I. Title of the project (including sub-topics)**

Mechanisms, Development, and Validation of Brief Verbal Intervention in Promoting Influenza Vaccination Uptake

# II. Rationale for the project

## (i) Significance of the study

### 1. Influenza poses a serious threat to public health and a heavy burden on the economy.

Influenza ("flu" for short, hereinafter the same) is a respiratory infectious disease caused by influenza viruses, the virus antigenic variable and rapid transmission, can cause seasonal epidemics every year, more serious harm to human health [1] . Although influenza is one of the five internationally monitored infectious diseases by the World Health Organization (WHO), influenza still affects up to 1 billion people globally each year, including 3-5 million severe cases and 290,000-650,000 respiratory disease-related deaths [2, 3] . Wang Q et al. (2022) estimated, based on China's influenza surveillance data, that the cumulative number of influenza cases in China during the 2010-2020 period was 894,550, with a total of 1.5 million deaths. 89,453,000 people were infected with influenza in China cumulatively during 2020, with an average annual incidence rate of 6.5 per 1,000 [4] ; in terms of different age groups, children aged ≤ 14 years had the highest influenza incidence rate per 1,000 (15.86 per 1,000), which was 3.1 and 6.6 times higher than that of the young people and the≥ elderly aged 60 years, respectively [5] . On average, influenza causes 8.2% of all respiratory disease excess deaths each year nationally, with≥ 60-year-olds accounting for 80% of all influenza-related excess deaths in the population [6] . **In addition, the annual economic burden caused by seasonal influenza in China** is about RMB 33 billion to 106 billion, equivalent to 0.3‰ to 1‰ of the gross domestic product (GDP) in 2019 [7, 8] ; Lai X et al. (2021), targeting three categories of at-risk populations, found that most of them used outpatient services and over-the-counter medications, with the elderly having the highest average economic burden (RMB 1,796), followed by ≤5-year-olds (RMB 1,647) [9] ; the economic burden increases significantly when hospitalization services need to be used, with the direct medical cost of hospitalization for the elderly ranging from RMB 14,250 to RMB 14,939, which is equivalent to 60% and 200% of the annual average per capita income of the urban and rural elderly populations, respectively [10] . These studies indicate that **influenza epidemics not only cause serious health impacts but also heavy economic burdens**, and measures to control influenza epidemics are urgently needed.

### Influenza vaccination is the most cost-effective measure to prevent influenza

Influenza vaccination is an effective means of preventing influenza and reducing influenza-related severe illness and death [1] . Since 2018, the Chinese Center for Disease Control and Prevention has issued the current year's "Technical Guidelines for Influenza Vaccination in China" every year. After synthesizing a large amount of the latest research evidence, especially in China, the 2023-2024 version of the guidelines shows that annual vaccination is the most cost-effective measure to prevent influenza, and in principle, it is recommended that≥ people at 6 months of age who have the will and have no contraindications to vaccination should receive the vaccine, and priority is given to recommending timely vaccination for 8 categories of key and high-risk groups [1] . **In addition, a number of policies reflect China's active promotion of influenza vaccination.** The Action for a Healthy China (2019-2030) explicitly states that "children, the elderly, and people with chronic diseases are high-risk groups for influenza" and "encourage areas with the conditions to provide free influenza vaccination for household residents over 60 years of age, young children in daycare institutions, primary and secondary school students, and students in secondary specialized schools" [11] ; the General Office of the State Council issued the "14th Five-Year Plan for National Health" re-emphasized "to do a good job of influenza vaccine supply security, and to promote the key groups of influenza vaccination" [12] . Thus, the prevention and control of influenza is of great strategic significance to the realization of the grand goal of a healthy China.

### Flu vaccination dilemma to be resolved

Influenza vaccine belongs to the second category of vaccine in most regions of China, and is a voluntary, self-funded vaccination [13] . **Currently, the overall performance of the vaccination rate is on the low side**, and the annual average vaccination rate of the whole population of China's influenza vaccine in 2018-2021 is 2.5%~3.2%, and that of high-risk groups such as patients with chronic diseases is 4%, and that of the elderly aged 60 years old and above is 3.8%, and its coverage is far lower than that of the World Health Organization's (WHO) recommendation that the vaccination rate of influenza vaccine for the elderly should be up to 75% [14, 15] . From the horizontal comparison of different countries in the past five years, the vaccination rate of children aged 6-59 months in China is 33%-47%, the highest is the United States (76%) and Argentina (73%), which is more than twice as high as that of our country [16] ; the vaccination rate of the general population in our country is 16.74%, the highest is Brazil (57.35%), and the rate of patients with chronic diseases is 14.12%, the highest is the Netherlands (81%), which is respectively the highest rate of our country. 81%), which are 3.5 and 6 times higher than ours respectively [17] . The World Health Organization (WHO) and the United Nations Children's Fund (UNICF) Joint Immunization Reporting Form shows that only 27% and 9% of influenza vaccines have been introduced in Southeast Asia and Africa, respectively [18] , and influenza vaccination rates in many low- and middle-income countries are also generally low [19] . Therefore, there is an urgent need to explore the influencing factors of influenza vaccination in China and the intervention strategies to cope with it.

## (ii) Current status and analysis of China and international research

### 1. Factors affecting vaccination and the theoretical model of vaccine hesitancy

**Many explorations have been conducted at home and abroad on the influencing factors of vaccination, and more mature conceptual models have been proposed**. The earliest is the "3C" model proposed by the Strategic Advisory Group of Experts on Immunization (SAGE) of the World Health Organization (WHO) in 2011, which categorizes the influencing factors of vaccination into three groups: Confidence, Complacency, and Convenience [20] ; and Tailoring Immunization Programmes (TIP), which categorizes influences on vaccination as environmental and mechanistic factors, social support factors, personal motivational factors, and health worker influences [21] ; other theoretical frameworks used for guidance are the Health Belief Model (HBM), the Knowledge, Attitude and Practice (KAP) [22] . Based on the "3C" model, scholars in China have developed the "China Vaccination Influencing Factor Model", which is mainly divided into two categories: vaccine confidence and vaccine accessibility (Yu Mengke et al., 2019) [23] .

The existing literature in China summarizes vaccine influencing factors similarly to the above categories, with some more prominent or idiosyncratic factors being**:** lower willingness to recommend by healthcare workers (increased workload and irrational performance appraisal and allocation system) [22] , social norms (attitudes of surrounding populations towards vaccination) [24] and accessibility (price, efficacy, and procedures for Type II vaccination [25] . **For influenza vaccine, the most important influencing factors are the lack of knowledge about influenza and vaccine among the general public** and the large knowledge gap among healthcare workers, which leads to their not common behavior of recommending influenza vaccine to high-risk groups [26] ; the preferential policies on the cost of vaccination, especially the free vaccination policy, can increase the rate of vaccination to a great extent [27] ; for different population groups, the elderly have low willingness to be vaccinated, busy workload of medical staff and lack of knowledge of influenza vaccine among parents of children groups are negatively associated with influenza vaccination rates [15, 22, 25] .

### Interventions to improve influenza vaccination

Intervention strategies currently available to ameliorate the influenza vaccination dilemma can be categorized into three groups: informative and educational, motivational, and reminder. **Educational** approaches include text messages or personalized messages [28] , videos, flyers or posters for older adults (especially for older adults) [29-31] , and pamphlets on influenza for pregnant women, etc. [32] ; the content focuses on the safety and efficacy of the influenza vaccine. **Incentives** include subsidies for vaccination, rewards for vaccination, etc.([33, 34]) . **Reminders** are mainly physician reminders, including brief advice on influenza vaccine for pregnant women during antenatal care [35] , clinician-initiated recommendations during primary care visits [36] , and advice for older adults with chronic diseases [37] . There are also specific interventions such as Pay-it-forward [38] and Peer Comparison (PC) [39] that have been shown to increase influenza vaccination rates.

Brief verbal intervention (BVI) is a combination of informative and educational and reminder interventions, specifically **a technique in which health professionals address specific issues with health service recipients in a short period of time through brief advice or counseling**, which is a type of brief intervention. BVI is commonly used to improve behaviors such as reducing alcohol intake and smoking cessation ([ 40 41]). 40, 41]) , and the above literature also suggests a role in improving influenza vaccination rates, but no studies have been conducted on brief verbal interventions in vaccination centers (e.g., community health service vaccination clinics, township health centers, etc.) with vaccination information registrars as the intervention implementers.

In summary, the present study is expected to explore the mechanisms behind Brief Verbal Interventions based on the "3C" model in the specific scenario of vaccination centers, and to develop feasible and effective Brief Verbal Interventions to address the influencing factors of influenza vaccination, so as to enrich the existing interventions to improve the vaccination rate of influenza vaccine and other secondary vaccines. The study will explore the mechanisms behind the Brief Verbal Intervention approach.

## Key references:

[1]  Chinese Center for Disease Control and Prevention. Technical guidelines for influenza vaccination in China (2023-2024) [EB/OL]. (2023-09-07)[2023-09-14]. https://www.chinacdc.cn/yyrdgz/202208/P020220825503464006546.pdf.

[2]  Organization WH. global influenza strategy 2019-2030[EB/OL]. (2019-03-11)[2023-08-21]. https://apps.who.int/iris/handle/10665/311184.

[3]  Iuliano AD, Roguski KM, Chang HH, et al. Estimates of global seasonal influenza-associated respiratory mortality: a modelling study[J]. Lancet, 2018, 391(10127): 1285-300. doi:10.1016/s0140-6736(17)33293-2.

[4]  Wang Q, Yang L, Liu C, et al. Estimated Incidence of Seasonal Influenza in China From 2010 to 2020 Using a Multiplier Model[J]. JAMA Netw Open, 2022, 5(4): e227423. DOI:10.1001/jamanetworkopen.2022.7423.

[5]  Sun S, Fu C, Cong J, et al. Epidemiological features and trends of influenza incidence in mainland China: a population-based surveillance study from 2005 to 2015[J]. Int J Infect Dis, 2019, 89: 12-20. doi:10.1016/j.ijid.2019.08.028.

[6]  Li L, Liu Y, Wu P, et al. Influenza-associated excess respiratory mortality in China, 2010-15: a population-based study[J]. Lancet Public Health, 2019, 4(9): e473-81. DOI:10.1016/S2468-2667(19)30163-X.

[7]  Gong H, Shen X, Yan H, et al. Estimation of seasonal influenza disease burden in China, 2006-2019[J]. Chinese Medical Journal, 2021, 101(08): 560-7.

[8]  C C, N P, RY X, et al. Economic burden of seasonal influenza in mainland China from 2011 to 2019[EB/OL]. (2021-10-20)[2023-08-15]. https://isirv.org/site/images/conferences/ISIRV_WHO_Virtual/Poster%20List%20-%2015%20October.pdf.

[9]  Lai X, Rong H, Ma X, et al. The Economic Burden of Influenza-Like Illness among Children, Chronic Disease Patients, and the Elderly in China: A National Cross-Sectional Survey[J]. Int J Environ Res Public Health, 2021, 18(12). DOI:10.3390/ijerph18126277.

[10]  ZHU Ai-Qin, ZHENG Ya-Ming, QIN Ying. A systematic review of research on the economic burden of influenza in China[J]. Chinese Journal of Preventive Medicine, 2019, 53(10): 1043-8.

[11]  Healthy China Action Promotion Committee. Healthy China Action (2019-2030) [EB/OL]. (2019-07-30)[2023-08-25]. https://www.gov.cn/xinwen/2019-07/15/content_5409694.htm.

[12]  General Office of the State Council. "14th Five-Year Plan for National Health" [EB/OL]. (2022-04-27)[2023-08-25]. https://www.gov.cn/zhengce/zhengceku/2022-05/20/content_5691424.htm.

[13]  National Influenza Center. What are Class I and Class II vaccines? Which category does the influenza vaccine belong to? [EB/OL]. (2019-12-25)[2023-08-26]. https://ivdc.chinacdc.cn/cnic/lgwd/ptlg/201912/t20191225_209375.htm.

[14]  Fan J, Cong S, Wang N, et al. Influenza vaccination rate and its association with chronic diseases in China: Results of a national cross-sectional study[J ]. Vaccine, 2020, 38(11): 2503-11. DOI:10.1016/j.vaccine.2020.01.093.

[15]  SUI Hai-Tian, GUO Yang, ZHAO Jie. New advances in the safety, efficacy and current status of influenza vaccination in high-risk populations[J]. Chinese Journal of Epidemiology, 2022, 43(03): 436-9.

[16]  Chan PS, Fang Y, Kawuki J, et al. Parental Acceptance, Parental Hesitancy, and Uptake of Seasonal Influenza Vaccination among Children Aged 6-59 Months. A Systematic Review and Meta-Analysis[J]. Vaccines (Basel), 2023, 11(8). DOI:10.3390/vaccines11081360.

[17]  Chen C, Liu X, Yan D, et al. Global influenza vaccination rates and factors associated with influenza vaccination[J]. Int J Infect Dis, 2022, 125: 153-63. DOI:10.1016/j.ijid.2022.10.038.

[18]  Sambala EZ, Ngcobo N, Machingaidze S, et al. A global review of seasonal influenza vaccine introduction: analysis of the WHO/UNICEF Joint Reporting Form [J]. Expert Rev Vaccines, 2019, 18(8): 859-65. doi:10.1080/14760584.2019.1640119.

[19]  Ortiz JR, Neuzil KM. Influenza Immunization in Low- and Middle-Income Countries: Preparing for Next-Generation Influenza Vaccines[J]. J Infect Dis, 2019, 219(Suppl_1): S97-106. doi:10.1093/infdis/jiz024.

[20]  Organization WH. World Health Organization Report of the SAGE Working Group on Vaccine Hesitancy [EB/OL]. (2014-12-30)[2023-09-14]. https://www.asset-scienceinsociety.eu/sites/default/files/sage_working_group_revised_report_vaccine_hesitancy.pdf.

[21]  Organization WH, Europe ROF. TIP: tailoring immunization programmes[EB/OL]. (2019-10-23)[2023-09-14]. https://www.who.int/europe/publications/i/item/9789289054492.

[22]  LU Liqin, WANG Xiaohua, LONG Wenyan, et al. Progress of vaccine hesitancy research in China in recent years[J]. Shanghai Preventive Medicine, 2023: 1-9.

[23]  YU Meng-ke, WU Jiang, LU Min, et al. A review of social factors affecting vaccination[J]. China Vaccine and Immunization, 2019, 25(03): 340-4.

[24]  ZHANG Xuehai, LI Na, ZHANG Shuangfeng, et al. Progress of research on the current status of the second type of vaccination and its influencing factors in China[J]. Chinese Journal of Preventive Medicine, 2018, 19(07): 548-52.

[25]  WANG Wenchang, WANG Huaqing. An analysis of the current situation and factors influencing non-immunization vaccination in China[J]. China Vaccine and Immunization, 2020, 26(01): 93-7.

[26]  PENG Qibin, WANG Dayan, YANG Juan, et al. Current status of influenza vaccine application in China and discussion of policies to promote vaccination[J]. Chinese Journal of Epidemiology, 2018, 39(8): 1045-50.

[27]  ZHAO Hongting, PENG Qibin, NI Zhaolin, et al. Survey on influenza vaccination policy and vaccination status in China during the 2020-2021 and 2021-2022 influenza epidemic seasons[J]. Chinese Journal of Preventive Medicine, 2022, 56(11): 1560-4.

[28]  Zhou X, Zhao X, Liu J, et al. Effectiveness of Educational Intervention on Influenza Vaccine Uptake: a Meta-Analysis of Randomized Controlled Trials[J]. . Iran J Public Health, 2020, 49(12): 2256-63. doi:10.18502/ijph.v49i12.4805.

[29]  Li P, Hayat K, Jiang M, et al. Impact of video-led educational intervention on the uptake of influenza vaccine among adults aged 60 years and above in China. A study protocol for a randomized controlled trial[J]. Bmc Public Health, 2021, 21(1): 222. DOI:10.1186/s12889-021-10220-1.

[30]  Jiang M, Yao X, Li P, et al. Impact of video-led educational intervention on uptake of influenza vaccine among the elderly in western China: a community- based randomized controlled trial[J]. Bmc Public Health, 2022, 22(1): 1128. DOI:10.1186/s12889-022-13536-8.

[31]  Ho HJ, Tan YR, Cook AR, et al. Increasing Influenza and Pneumococcal Vaccination Uptake in Seniors Using Point-of-Care Informational Interventions in Primary Care in Singapore: a Pragmatic, Cluster-Randomized Crossover Trial[J]. Am J Public Health, 2019, 109(12): 1776-83. doi:10.2105/AJPH.2019.305328.

[32]  Wong VW, Lok KY, Tarrant M. Interventions to increase the uptake of seasonal influenza vaccination among pregnant women: a systematic review[J]. Vaccine, 2016, 34(1): 20-32. doi:10.1016/j.vaccine.2015.11.020.

[33]  Yeung K, Tarrant M, Chan K, et al. Increasing influenza vaccine uptake in children: a randomized controlled trial[J]. Vaccine, 2018, 36(37): 5524-35. doi:10.1016/j.vaccine.2018.07.066.

[34]  Rashid H, Yin JK, Ward K, et al. Assessing Interventions To Improve Influenza Vaccine Uptake Among Health Care Workers[J]. Health Aff (Millwood), 2016, 35(2): 284-92. doi:10.1377/hlthaff.2015.1087.

[35]  Wong V, Fong D, Lok K, et al. Brief education to promote maternal influenza vaccine uptake: a randomized controlled trial[J]. Vaccine, 2016, 34(44): 5243-50. doi:10.1016/j.vaccine.2016.09.019.

[36]  You Y, Li X, Jiang S, et al. Can primary care physician recommendation improve influenza vaccine uptake among older adults? A community health centre- based experimental study in China[J]. BMC Prim Care, 2023, 24(1): 16. DOI:10.1186/s12875-023-01980-3.

[37]  Yi B, Zhou S, Song Y, et al. Innovations in adult influenza vaccination in China, 2014-2015: Leveraging a chronic disease management system in a community -based intervention[J]. Hum Vaccin Immunother, 2018, 14(4): 947-51. doi:10.1080/21645515.2017.1403704.

[38]  Wu D, Jin C, Bessame K, et al. Effectiveness of a pay-it-forward intervention compared with user-paid vaccination to improve influenza vaccine uptake and community engagement among children and older adults in China: a quasi-experimental pragmatic trial[J]. Lancet Infect Dis, 2022, 22(10): 1484-92. DOI:10.1016/S1473-3099(22)00346-2.

[39]  Loiacono MM, Nelson CB, Grootendorst P, et al. Impact of a peer comparison intervention on seasonal influenza vaccine uptake in community pharmacy: a national cluster randomized study[J]. J Am Pharm Assoc (2003), 2021, 61(5): 539-46. DOI:10.1016/j.japh.2021.04.004.

[40]  Gette JA, Regan T, Schumacher JA. Screening, brief intervention, and referral to treatment (SBIRT) for cannabis: a scoping review[J]. J Subst Use Addict Treat, 2023, 146: 208957. doi:10.1016/j.josat.2023.208957.

[41]  Ghosh A, Singh P, Das N, et al. Efficacy of brief intervention for harmful and hazardous alcohol use: a systematic review and meta-analysis of studies from low middle-income countries[J]. Addiction, 2022, 117(3): 545-58. DOI:10.1111/add.15613.

# III. Research objectives, research content indicators, technical routes and key issues to be addressed

## (i) Research objectives

The goal of this study was to develop and validate the Brief Verbal Intervention to increase influenza vaccination rates. This is organized into the following 3 sub-objectives:

1. **Explore** the influences (barriers, facilitators) of influenza vaccination in China;
2. **Develop** the Brief Verbal Intervention (line program) for three populations to address the influencing factors;
3. **Validate** the effectiveness of the Brief Verbal Intervention in Increasing Influenza Vaccination Rates.

## (ii) Content of the study

### 1. Exploring the influencing factors of influenza vaccination in China based on the "3C" model theory

In order to develop the Brief Verbal Intervention, the first priority was to explore the factors that influence influencing influenza vaccination rates in China, which was divided into two major steps - refining the scoping review, and stakeholder co-development.

**Through the improvement of the scoping review, the influencing factors of the influenza vaccination rate in China have been clarified.** In this study, we will refine the existing scoping review under the theoretical guidance of the World Health Organization's "3C" model (three dimensions: Confidence, Complacency, and Convenience), and develop a short, simple, and comprehensive set of factors that influence influenza vaccination rates in China. We will refine the existing scoping review, develop a conceptual framework for the potential mechanism of verbal intervention, and form the first version of the "Influence Factors of Influenza Vaccination Rate in China", in order to provide the basis for the development of a more scientific and targeted brief verbal intervention program.

**To improve the set of factors influencing influenza vaccination rate in China through stakeholder co-production.** The stakeholders in this study include research subjects, intervention strategy implementers, and relevant government departments, etc. Through co-production, the stakeholders are regarded as collaborative partners rather than passive objects in the development of intervention strategies. The second version of the "Influential Factors for Influenza Vaccination Rate in China" was developed through interviews and focus groups to obtain a more comprehensive set of influencing factors that is more in line with the actual situation in China, and to provide a reference for the development of interventions to improve influenza vaccination rate.

### Developing Brief Verbal Intervention implementation strategy adapted to China context

After obtaining the set of factors influencing influenza vaccination rates based on the actual situation in China, the next step is the targeted development of the Brief Verbal Intervention line program, which is divided into two major steps - the development of a preliminary program of active lines, and the co-development by stakeholders.

**Development of the Brief Verbal Intervention based on the "3C" model and the set of factors influencing influenza vaccination rates in China.** Based on the three dimensions of the "3C" model (trust, complacency, and convenience), the researcher synthesized the second edition of the "Influence Factor Set of Influenza Vaccination Rate in China" mentioned above, and chose important and modifiable influences among them, and developed the Brief Verbal Intervention line. Program. Considering the different age groups of the study participants (children, adults, and the elderly), **the study will develop different line programs for the three groups, and the following is an example for the elderly**. If the study population is the elderly, the active line of the intervention implementer will be triggered, "Elderly people, flu vaccination can reduce the number of colds, and even if you have a cold, your symptoms will be much lighter, academician Zhong Nanshan said that it is good to get the flu vaccine, so if you want to get it, you can take a shot today. Among them, "reducing the number of colds and relieving the symptoms of colds" corresponds to the **complacency dimension** in which the masses perceive the effectiveness of the vaccine, "Academician Zhong Nanshan recommended it" corresponds to the **confidence dimension** in which the masses trust the decision makers, and "you can take a shot today by the way" corresponds to the accessibility of vaccination in the **convenience dimension**.

**Interviews with intervention practitioners and vaccinators will be used to refine the brief verbal intervention protocol**. Based on the above literature, theories, and brainstorming within the research team to obtain the preliminary line plan of the Brief Verbal Intervention, we should also take into full consideration the actual situation of influenza vaccination, the feasibility of the intervention, and so on, so we need to consult the front-line implementers of the Brief Verbal Intervention and the vaccinators to improve the opinions. Specifically through interviews, focus groups and other forms to fully absorb the feasibility, operability and compatibility of the Brief Verbal Intervention, and ultimately form the Brief Verbal Intervention script that can be used in a randomized controlled trial, to provide an important basis for the validation of the effectiveness of the intervention implementation strategy.

### Validating Brief Verbal Intervention implementation strategy adapted to primary care settings in China

After obtaining a refined Brief Verbal Intervention tableau protocol, the next step is to test the effectiveness of this implementation strategy in increasing influenza vaccination rates. This study will use a two-arm, whole-group Randomized Controlled Trial (RCT) in order to provide the highest level of evidence for the effectiveness of the intervention. This will be done by adding an active line (i.e., the brief verbal intervention) to the registration of vaccination information by the intervention implementer, with the control group performing the normal vaccination procedure and the intervention group triggering a different active line depending on the age group of the vaccinated person, in order to test the efficacy of this novel implementation strategy of the Brief Verbal Intervention.

Prior to the formal conduct of the randomized controlled trial, 1 healthcare facility needs to be selected for pilot validation, and all aspects of the pretrial are consistent with the formal trial except for the smaller scale. **The pre-trial has three main objectives**: first, to verify the rationality and feasibility of the Brief Verbal Intervention protocol, second, to provide a basis for the calculation of the sample size required for the formal trial, and lastly, to provide an important reference for the determination of the details of the formal trial on-site (for details, please refer to the list of questions to be confirmed in the pre-trial in Appendix I).

## (iii) Key issues to be addressed

**First, it is necessary to identify the key factors affecting influenza vaccination rates and design corresponding Brief Verbal Interventions.** Based on the refinement of the scoping review, the co-development of stakeholders, and the actual situation of vaccination in China's primary healthcare institutions, this study will design a simple, easy-to-use, reasonable, and actionable Brief Verbal Intervention protocol; at the same time, the intervention practitioner's proactive protocols will be tried out in the pre-testing stage to test the feasibility and reasonableness of the protocols and the intervention mechanism, and then modified and improved to fully fit the research site and achieve the research purpose. The results of the pre-test were then modified and improved to fully fit the research site and achieve the research objectives.

**Second, there is a need to select an appropriate study design as well as to ensure that the design protocol is implemented specifically.** One of the aims of this study was to examine the effectiveness of the brief verbal intervention as a novel strategy to improve influenza vaccination rates. Compared with cross-sectional or cohort studies, randomized controlled trials have better intergroup comparability, and the effect of changes in influenza vaccination rates achieved by balancing the characteristics of the intervention and the control groups, combined with the control of confounding factors, is attributable to the implementation strategy of the brief verbal intervention. Randomized controlled trials are also the gold standard for evaluating interventions, with the highest strength of evidence, authentic and reliable results, and the ability to draw scientific conclusions about the effectiveness of Brief Verbal Interventions. Even if the effectiveness of Brief Verbal Interventions is low, they may still have a significant impact on public health at the population level due to their low cost and high generalizability.

# IV. Proposed research program and feasibility analysis.

## (i) Research program

### 1. Mechanism sorting: forming a set of factors influencing influenza vaccination in China

1. **Literature search to refine the scoping review**

Focusing on the purpose of the study, a number of relevant subject terms were formulated and searched in the literature databases, including PubMed, Web of Science, China Biomedical Literature Database, Zhi.com, Wanfang, and Weipu. For "influenza vaccination", we first searched for reviews and selected scoping reviews to carefully review and organize and list the aspects related to "influencing factors of influenza vaccination". Secondly, we limited the subject terms to those that appeared in the title or abstract, and filtered the relevant literature by roughly reading the titles or abstracts to refine the scenarios, scales, and influencing factor results obtained from the different studies. Finally, the search was not limited to influenza vaccines, but was extended to "vaccination", and the impact factors were extracted from a cursory reading of the title and abstract, and if there were any ambiguities or unique points found, the text was read to obtain more comprehensive information. The table below shows an example of the search strategy and results in the PubMed database.

**Table 1 Literature search strategies and results (using PubMed database as an example)**

| **Serial number** | **Retrieval strategy** | **Search results** |
| --- | --- | --- |
| 1 | ("influenza"[Title] AND "uptake"[Title] AND ("vaccine"[Title] OR "vaccination"[Title])) AND (**review**[Filter]) | 22 |
| 2 | ("uptake"[Title] AND ("vaccine"[Title] OR "vaccination"[Title]) AND ("determinants"[Title] OR "factors"[Title] OR "barriers"[Title] OR " enablers"[Title])) AND (**review**[Filter]) | 34 |
| 3 | "influenza"[Title] AND "uptake"[Title] AND ("vaccine"[Title] OR "vaccination"[Title]) AND ("**barriers**"[Title] OR "**enablers**"[Title] OR " **determinants**"[Title] OR "**factors**"[Title]) | 136 |

*Retrieved September 13, 2023

1. **Team consensus on the first version of the conceptual framework for the set of influencing factors and mechanisms of action**

Based on an assessment of conceptual models related to vaccine hesitancy ("vaccine hesitancy") by the World Health Organization's Strategic Advisory Group of Experts on Immunization (SAGE), the "3C" model and the "Matrix of Determinants of Vaccination Intentions" were found to be the most useful. The "3C" model and the "Vaccine Hesitancy Determinants Matrix" were found to be the most useful. The "3C" model visualizes the three main aspects of vaccine hesitancy through the dimensions of Confidence, Complacency, and Convenience (see Figure 2 for details); the "Matrix" captures the complexity of influencing factors behind vaccine hesitancy more comprehensively in terms of context, individual and group, and vaccine-specific factors (see Table 2 for details). In this study, we will extract influenza vaccination influencing factors from the literature, categorize them according to the above dimensions and specific aspects, excavate the mechanisms of action, mediating variables, or theoretical foundations involved behind them, convene a discussion and reach a consensus in the team to form the first version of the influencing factor set of influenza vaccination in China, and develop a conceptual framework of the potential mechanisms of action of the strategy of brief verbal intervention.


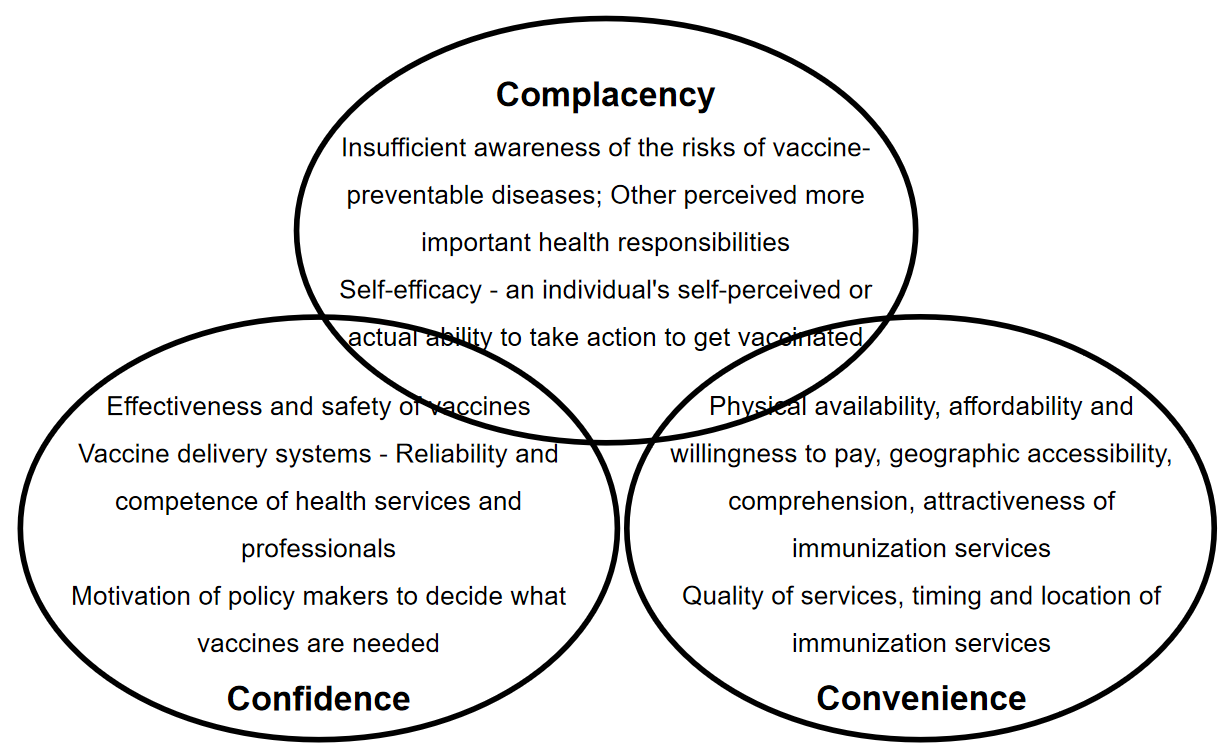


**Figure 2 "3C" model**

1. **Co-production leading to the second edition of the set of impact factors**

Stakeholders in this study included four groups of people: (1) people who go to primary healthcare structures for vaccination; (2) healthcare workers who provide vaccination services, such as nurses at the triage desk, public health physicians at the information registration desk, and vaccination nurses; (3) managers of vaccination services, such as heads of vaccination departments and managers of vaccine and refrigeration equipment; and (4) a team of specialists in a variety of fields, including implementation science, immunization planning, policy development, epidemiology, and health services. Through in-depth interviews with the above stakeholder groups, opinions on influencing factors of influenza vaccination were fully absorbed to form the second version of the influencing factors set that fully reflects influenza vaccination in China.

**Table 2 Matrix of determinants of vaccination intentions**

| **Matrix dimensions and connotations** | **Breakdown of concepts (indicators)** |
| --- | --- |
| Contextual  (due to historical, socio-cultural, environmental, health system/institutional, economic or political)  (Impact of factors) | 1. Communication and media environment 2. Influential leaders, gatekeepers of immunization programmes and anti- or pro-vaccination lobbies 3. historical influence 4. Religion/culture/gender/socio-economic 5. Political/policy 6. Geographical barriers 7. Perspectives on the pharmaceutical industry |
| Individuals and groups  (Individual and Group)  (Individual perceptions of vaccines or the impact of social/peer environments) | 1. Individual, family and/or community member's experience with vaccination, including pain 2. Beliefs and attitudes about health and prevention 3. Knowledge/awareness 4. Healthcare Systems and Providers - Trust and Personal Experience. 5. Risk/benefit (perceived, heuristic) 6. Immunization as a social norm or unwanted/harmful |
| Vaccine Specific (Vaccine/Vaccination)  Directly related to vaccines or vaccinations | 1. Risks/benefits (epidemiological and scientific evidence) 2. Introduction of new vaccines or formulations, or new recommendations for existing vaccines 3. vaccination 4. Vaccination program design/vaccination modalities (e.g., routine programs or mass vaccination campaigns) 5. Reliability and/or source of supply of vaccines and/or vaccination equipment 6. Reliability and/or source of supply of vaccination equipment 7. Vaccination schedule 8. (manufacturing, production etc) costs 9. Strength of recommendations, knowledge base, attitude of healthcare professionals |

### Intervention development: Brief Verbal Intervention implementation strategy and line programs

1. **Modeling guide to develop a preliminary line program for brief verbal interventions**

Based on the "3C" model and the second version of the set of influencing factors, the development of lines for different age groups of the vaccination population, including: ① infants, toddlers or preschoolers, usually accompanied by elders to receive vaccination; ② adults aged 18 years old and younger than 60 years old; ③ elderly people aged 60 years old and above, usually accompanied by their children to receive vaccination. In the set of influencing factors of different age groups have different emphasis, so the development of lines need to design the key points are not consistent, for the children's group emphasizes "saving parents' time and energy and money costs, does not affect the child's learning", for the adult group emphasizes "the role of the family's protection, the impact of illness on work". For the adult population, the emphasis is on "protection of family members, impact of illness on work", and for the elderly population, the emphasis is on "resistance, impact on existing chronic diseases". Specific line scenarios for the different population groups are shown in the table below.

**Table 3 Active lines program for age-grouped populations**

| **Population** | **Brief Verbal Intervention Lines Program** |
| --- | --- |
| Children (accompanied by parents) | The flu vaccine can reduce the number of colds in children, and even if they do get a cold, the symptoms will be much less severe because they will be in contact with more people in the kindergarten (or in the case of older children, it will be replaced by the phrase, "If you get sick, it will interfere with your studies, and your parents will have to spend time taking care of you"). The flu shot builds up resistance, so you can get one today. |
| Adult population | Getting a flu shot reduces the number of colds you get, and even if you do get a cold, the symptoms are much milder and won't interfere with work; and it also protects the elderly and children in your family, who don't have as strong of a resistance (reducing the risk of bringing it back). Stop by and get a shot today. |
| Elderly (accompanied by children) | For the elderly, getting the flu vaccine will reduce the number of colds, and even if you do get a cold, your symptoms will be much less severe (otherwise you will get sick and your resistance will drop, which can lead to the onset of other chronic illnesses). Older people need to protect their bodies from the worries of younger people. Stop by and get vaccinated today. |

1. **In-depth interviews to refine unsolicited lines for different populations**

Based on the initial program of the Brief Verbal Intervention lines, combined with in-depth interviews with people involved in the actual process of vaccination, further refinement was made regarding the direction of rationality and feasibility of the active lines. Interviews were conducted with two groups of people: the general public who received the vaccine to learn about their knowledge and attitudes toward the influenza vaccine; and the medical staff who interacted with the public (nurses at the triage desk and public health physicians at the registration desk) to learn about their communication speech habits, which age groups they come into contact with more, and the key vaccine information that they are concerned about. In addition to in-depth interviews, the researchers went to local health facilities to conduct non-participatory observation to understand the actual steps in the vaccination process, and observed and recorded the characteristics of the people who came to be vaccinated, and the daily communication between medical staff and the people beforehand at the triage and registration counters.

### Validation of effects: conducting a two-arm randomized controlled trial

In order to test the effectiveness of the Brief Verbal Intervention tableau protocol, this study will use a two-arm randomized controlled trial, which will be described below following the methodology section of SPIRIT, a common reporting specification for research design.

#### Study Participants, Interventions, and Outcomes

**Research setting:** Ningbo, Zhejiang Province, Hohhot, Inner Mongolia Autonomous Region, Shaoyang, Hunan Province (multi-center)

**Inclusion and exclusion criteria:**

**For healthcare institutions**, the inclusion criteria are (1) primary healthcare institutions such as community health service centers and village health centers (both public and private); (2) provision of influenza vaccination services. And exclusion criteria are (1) healthcare institutions that have participated in other studies related to the improvement of influenza vaccination rates; and (2) healthcare institutions that have only one vaccination staff.

**For the study population**, the inclusion criteria are (1) people who go to medical institutions for vaccination (regardless of vaccine type); (2) people ≥6 months of age without contraindications to influenza vaccination. And exclusion criteria are (1) people who go to medical institutions for influenza vaccination; and (2) people who have already received influenza vaccine during the current influenza epidemic season.

**For the intervention implementers**, the inclusion criteria are medical personnel who interact with the vaccinated population and registered the vaccination information.

**Interventions:** (follow TIDieR reporting norms described below)

① Name of the intervention: Brief Verbal Intervention (BVI)

② What is the intervention: the materials of the intervention, i.e., the active lines program for the three groups of people (see Table x of 2.(1)), emphasize different key points, respectively, the child population accompanied by parents emphasizes the impact on parental energy and children's learning, the adult population emphasizes the protection of family members and the impact on work, and the elderly population accompanied by children emphasizes the impact on resistance and existing chronic diseases. The intervention will be programmed as an exchange between the vaccinated population and the medical staff, who triggered the appropriate proactive lines according to the age group of the population when registering the vaccination information.

③ Who provides the intervention: the medical staff who registers information on vaccinations, usually a public health physician.

④ How the intervention will be implemented: the active lines will be administered by the medical staff one at a time during the registration of each vaccinated person's information, and will be verbally communicated to the vaccinated person face-to-face by the medical staff.

⑤ Place of intervention implementation: the Brief Verbal Intervention can be conducted in the same place where study participants are recruited or data are collected, i.e., within the healthcare facility where influenza vaccination services are provided, specifically at the vaccination information registration desk.

⑥ Intervention implementation time: for the same vaccinated person, the Brief Verbal Intervention, i.e., speaking a program of active lines, is implemented when the medical staff first registers his/her vaccination information.

⑦ Intervention Adjustment: The last sentence of the active line for all three groups of people is "You can drop by for a vaccination today", which needs to be adjusted to "You can drop by for an appointment for a vaccination today" when you encounter the following situations, including those who have already planned to receive 2 types of vaccines before the intervention, There are types of vaccinations that are not suitable to be given at the same time as the influenza vaccine (e.g. influenza vaccine, HPV vaccine, New Crown vaccine, rabies vaccine, etc.).

⑧ Fidelity of intervention: all interventionists will be trained in the Brief Verbal Intervention program and monitored during the first 14 days of the intervention; if there is a failure to intervene (2 out of 10 or more), or if there is an error in the intervention program, medical staff will be alerted; if the intervention is performed normally, the intervention will be evaluated on 3 days of random sampling in the subsequent period.

**Study outcome:** The primary outcome indicator will be "whether to receive/book an appointment for influenza vaccination" (dichotomous variable), and the secondary outcome indicators were vaccination attitude, influenza and influenza vaccine awareness, and influenza infection rate, etc. The specific content of the outcome indicators and the data collection tool are shown in the table below (see Appendix II and III for details of the form).

**Table 4 Outcomes and data collection tools**

| **Outcomes** | **Meanings** | **Data collection tools** | **Filler** |
| --- | --- | --- | --- |
| Primary outcome | Whether or not to get a flu shot/book an appointment | Outpatient Information Platform for Medical Institutions | Data system export |
| Secondary outcome | Vaccination attitude  (based on the "3C" model) | General and Influenza Vaccines  Attitudinal questionnaire  (four levels of scoring; total score calculated) | Vaccination of the population  medical personnel |
| Influenza and Influenza Vaccine Awareness | Influenza and Influenza Vaccine Knowledge Questionnaire  (judgment + choice; total score calculated) | Vaccination of the population  medical personnel |
| Set of intervention impact indicators  (based on the RE-AIM framework) | CDC Infectious Disease System | Data system export |

**Study duration:** Influenza vaccine is a seasonal supply vaccine, usually for the annual influenza season, i.e., September of the current year to March of the following year, with slight variations in different regions. The length of the randomized controlled trial portion of this study is expected to be 4 months, specifically from November 2023 to February 2024, and the corresponding study process for each period is shown in the table below.

Table 5 Comparison of study duration and schedule

|  | Duration of the study | | | | | |
| --- | --- | --- | --- | --- | --- | --- |
| Recruitment and assignment | Post-assignment | | | | Ending |
| Time interval | 2023.10 | 2023.11 | 2023.12 | 2024.1 | 2024.2 | 2024.2 |
| **Recruitment into the group:** |  |  |  |  |  |  |
| Comparison of the Nairobi work programme | X |  |  |  |  |  |
| informed consent |  |  |  |  |  |  |
| Assignment to group | X |  |  |  |  |  |
| **Intervention implementation:** |  |  |  |  |  |  |
| General Processes |  |  |  |  |  |  |
| Brief Verbal Interventions |  |  |  |  |  |  |
| **Data collection:** |  |  |  |  |  |  |
| Baseline characteristics of the study population |  |  |  |  |  |  |
| Baseline characteristics of medical personnel | X |  |  |  |  |  |
| Whether or not to get the flu vaccine |  |  |  |  | X | X |
| vaccination attitude |  |  |  |  |  |  |
| Influenza and Vaccine Awareness |  |  |  |  |  |  |
| Set of intervention impact indicators |  |  |  |  | X | X |

**Sample size:** The sample size was calculated by taking the primary outcome indicator of whether or not influenza vaccination was received and combining it with the number of all enrolled study subjects to obtain the influenza vaccination rate indicator. The existing literature has set the influenza vaccination rate for the whole population at 10%, and this data will be updated based on the actual situation after the fieldwork is carried out. After the discussion of the expert consensus method, it was concluded that an increase of at least 10% in the vaccination rate could be considered clinically significant, and the test level was set at α=0.025 (unilateral), with a test efficacy of 0.9. The sample size of each group was obtained using the "Test for Two Proportions" function of the PASS 15 software, and the total sample size of each city was 526, and the total sample size of each city was 526, and the total sample size of each city was 526. Using the "Test for Two Proportions" function of PASS 15 software, the sample size of each group was 263, the total sample size of each city was 526, and the total sample size of the three cities was 1,578. Since the information of vaccination or appointment was collected instantly, the dropout rate of the participants was not considered.

**Recruitment of study participants:** Recruitment will take place at a point in time when people enter the healthcare facility, express their need for vaccination to the nurse at the triage desk, and will be exempted from informed consent for enrollment if they meet all the inclusion and exclusion criteria. Considering that if the study is introduced to the public and informed consent is signed at the triage desk, the public will block the triage desk, thus hindering the smooth implementation of routine medical procedures; and that the subsequent brief verbal intervention will not adversely affect any of the parties involved in the study, from the perspective of the study and not interfering with the field operation, the approach is to exempt informed consent before the intervention, and then to obtain informed consent after the intervention, before the collection of the study participants' baseline information and outcome indicators (Appendix IV).

#### Assignment of interventions

The study is a simple randomized controlled, purposive sampling of health care providers, with one primary care provider in each city among the coordinable providers in urban or rural areas, for a total of two providers;

Intervention implementers will be purposively sampled, with each healthcare facility sampled with the intervention implementer's years of experience as the primary purpose, and a total of two vaccinators were selected and randomly assigned to the intervention and control groups;

Subjects will be enrolled in the study by random sampling, a random list will be generated by an independent statistician, and a unique randomization number will be obtained by the investigator or a designated authorized person by assigning subjects to one of the intervention and control groups according to the random list. Because the study is essentially harmless to subjects, subjects will be only informed that we will be inviting them to participate in an influenza vaccine study and will be not informed that they would be assigned to the intervention and control groups. The grouping information receive by the statistician will be only the numerical code for the group and not the content. Due to the nature of the intervention, subjects and physicians will be aware of the study group to which subjects are assigned, whereas the person in charge of the study and data analysts will not be aware of the study group to which subjects were assigned. Sensitivity analyses will be done on subjects if they were not willing to participate in the study after the intervention.

#### Data collection, management and analysis

The data collection tools for the outcome indicators are shown in Table 4, and all tools will be entered into REDCap (REDCap system) to generate electronic QR codes, and the collected data will be stored in the system in real time, with only the researcher having access to view and manage the data. The data analysis include two major parts, first, the descriptive analysis to obtain the differences in influenza vaccination rates in terms of baseline characteristics of different vaccinees (e.g., gender, age, education, influenza and its vaccine awareness, vaccine attitudes, etc.), and baseline characteristics of different intervention implementers (e.g., gender, years of working experience, influenza and its vaccine awareness, vaccine attitudes, etc.), etc.; and second, the effect of the Brief Verbal Intervention evaluation, a generalized linear model (GLM) will be used to analyze the effect of Brief Verbal Interventions on boosting influenza vaccination rates, with intervention subgroups as independent variables and baseline data as covariates. The primary outcomes (whether or not they receive or make an appointment for influenza vaccination, dichotomous variables) will be assumed to be binomially distributed and log-link functions, and results will be expressed as risk ratios and their 95% confidence intervals (95% CIs). Covariate analyses incorporate the collected baseline characteristics of institutions and healthcare workers into the GLM to adjust for the effect of covariates on the effect. In addition, sensitivity analyses will be taken to confirm the robustness of the analysis and subgroup analyses will be conducted based on categories such as baseline characteristics of vaccinators and medical staff to obtain the intervention effect of Brief Verbal Intervention under different categories. The data analysis tools will be STATA 13.0 or SAS 9.4.

## (ii) Research methodology

This study adopts a mixed-method approach combining qualitative and quantitative methods. In the early stage of the study, qualitative methods (interviews and observations) will be adopted to obtain the potential influencing factors of influenza vaccination and the routine process of vaccination service provision, which provided important references for the key points to be emphasized in the Brief Verbal Intervention line program for different populations, and for the intervention executives and the time point; and in the mid-stage of the study quantitative methods (questionnaires and scales) will be adopted to obtain the knowledge and attitudes of vaccinators and medical staff towards influenza vaccine. In the middle of the study, quantitative methods (questionnaires and scales) will be used to obtain the knowledge and attitudes of vaccinators and medical personnel toward the influenza vaccine, in order to collect outcome indicator variables and provide a basis for subgroup analysis of the data.

### Semi-structured interviews

Semi-structured interviews will be used for the two main purposes of exploring the set of factors influencing influenza vaccination and refining the Brief Verbal Intervention line program. First, based on the five dimensions of the comprehensive framework for implementation research (CFIR), the five main parts of the interview outline will be designed for the purpose of the interview, including (1) the influenza vaccination itself; (2) the internal environment (personnel, structure, resources, etc. within the healthcare organization); (3) the external environment (attitudes of the general public towards vaccination, etc.); (4) personal characteristics (people involved in the influenza vaccination process, their abilities, opportunities, motivations, etc.); (5) the implementation process (each step of influenza vaccination), and based on the WHO "3C" model, design the active lines and key points to be emphasized for the three groups of people, and the interview outline includes topics with specific directions and questions for developed responses (see Appendix V). Informed consent forms, brief descriptions of the research projects, and published literature on similar studies (examples) will be prepared for the interviewees to read in advance.

Next, the interviewer conducts a one-on-one interview with the respondent in a quiet environment, and begins asking questions after obtaining informed consent and consent for recording. The interviewer should try to guide the respondent to share in-depth on relevant issues, provide concrete examples, and also provide enough space for the respondent to exercise multiple aspects of personal reflection; the interview needs to be paced, recorded, and followed up with timely questions at key points of information, and pulled back in time when it deviates from the purpose of the study. The number of interviewees is expected to be 10-15, and collection will stop when data saturation occurs.

Finally, the audio recordings of the interviews will be transcribed verbatim to generate the original interview materials, the text of the interview data will be coded based on the coding framework developed by CFIR with deduction as the main focus and induction as a supplement, and the text data will be organized and summarized using the NVivo 14 software to obtain the barriers or facilitators and their degree of influence under different dimensions.

### Non-participatory observation

Non-participant observation will be used to understand the routine process of vaccination services, from entering the healthcare facility, to explaining the purpose of the visit (vaccination or seeking other healthcare services), registering the vaccination information, administering the vaccine, and staying in the clinic, especially the content and manner of communication between the medical staff and the vaccinators. The researcher spends one day at each of the triage and registration counters. Since the researcher does not have the qualification of internship in a medical institution, and could not take the participatory observation, so the researcher will resort to non-participatory observation, i.e., observing next to the medical staff, similar to the "traineeship". During the observation, the following points will be recorded: (1) the time period; (2) the number of people of different age groups and the accompanying persons; (3) the common types of vaccinations; and (4) the communication between the medical staff who registered the vaccine information and those who received the vaccine, etc. In addition, the relevant materials (e.g., vaccine information) will be analyzed. In addition, photographs will be taken of relevant materials (e.g., vaccination registers), the internal layout of the healthcare organization, bulletin boards and promotional folders.

### Questionnaire and Scale Survey

Questionnaires and scales will be used to collect the knowledge and attitudes of the vaccinated population and medical personnel towards influenza and influenza vaccine, including the General Vaccine and Influenza Vaccine Attitude Questionnaire and the Influenza and Influenza Vaccine Knowledge Questionnaire. The questions will be designed based on the World Health Organization's "3C" model, with options on a four-point Likert scale of "1-4", with higher scores representing more positive attitudes toward vaccination and influenza vaccination. The questionnaire questions will be derived from the "China National Influenza Center - Influenza Q&A" and several literatures, and the questions will be divided into multiple-choice (single choice, multiple choice) and judgment questions, with one point for each correct answer, and the higher the score, the higher the knowledge of influenza and influenza vaccine of the participant. The total scores of the questionnaire and the scale will be used as secondary outcome indicators in this study.

### Two-group randomized controlled trial

A randomized controlled trial will be used to test the effectiveness of the Brief Verbal Intervention to enhance influenza vaccination rates, and the study participants will be randomly divided into two groups: the brief verbal intervention group (intervention group), and the group performing routine procedures (control group). Achieving no statistical difference (equilibrium) in factors other than the intervention through a randomized controlled trial is the gold standard for validation of intervention effectiveness.

## (iii) Feasibility analysis

**First, the intervention will be feasible.** The Brief Verbal Intervention refers to an additional active line related to the influenza vaccine when the medical staff registers the vaccination information, which is simple and easy to implement, coupled with the field observation that there are some medical staffs in the healthcare institutions who have similar behaviors spontaneously, that is, during the influenza vaccine supply season, they will take the initiative to inform the vaccinators of the information such as "there are vaccines available, and you can drop by for the vaccine" and so on. The intervention will be to provide more targeted lines, and to train healthcare workers to address key points (taking into account the different speaking habits of each individual), without having to express verbatim the provided line scheme.

**Second, the recruitment of the study population will be feasible.** In this study, the population who go to primary healthcare institutions for vaccination will be used as the study population. Under the National Immunization Program, school-age children are required to be accompanied by their guardians to receive free vaccines (Class I vaccines), as well as other Class II vaccines such as Hepatitis B vaccine, 23-valent pneumonitis vaccine, HPV vaccine, etc., so the population of the vaccination population is relatively abundant, and the types of the population are rich, which is able to provide guarantee for the recruitment of sufficient number of subjects for the present study. Therefore, the number and type of vaccinated population is relatively abundant, which can guarantee the recruitment of a sufficient number of subjects for this study.

**Third, data collection is feasible.** Observation is required for 30 minutes after vaccination in order to deal with possible adverse reactions or allergic reactions in a timely manner, and the researchers can utilize this time period to ask the research subjects to fill in the questionnaire and obtain information. The questionnaire will be filled out online by scanning the electronic QR code, which will be convenient for the vaccinators to fill out the questionnaire on their own cell phones, or the investigator could complete the questionnaire in the form of one-question-one-answer if it will be inconvenient. The above actions ensure that the vaccinators fulfilled the requirement to stay for 30 minutes, and also allow for the collection of outcome indicators needed for the study and other perceptions of the study participants about influenza vaccination.

# V. Features and innovations of the project

**First, the issue of influenza vaccination rates and potential mechanisms of action is viewed through the lens of implementation science.** The core idea of implementation science is to facilitate the translation of "proven evidence" into "practice", which corresponds to this study, which facilitates the translation of "guideline recommendations for influenza vaccination" into "increased influenza vaccination rates"; when the evidence does not actually materialize, many implementation science theories, models, and mechanisms can be used to facilitate the translation. "When evidence does not translate into practice, many implementation science theories, models, and frameworks can be used to explore the influencing factors behind the evidence. In this study, the Comprehensive Framework for Implementation Research (CFIR) will be used to design an interview protocol for intervention implementers and vaccine recipients to obtain information on the factors influencing influenza vaccination rates. When assessing the effectiveness of an intervention, the RE-AIM framework, which is often used in implementation science to assess implementation outcomes, will be used to evaluate the positive, negative, and unintended effects expected to be triggered by the Brief Verbal Intervention implementation strategy.

**Second, the novel measure of the Brief Verbal Intervention will be applied to boost influenza vaccination.** The brief verbal intervention used in this study is innovative in its own right, having been used extensively in smoking cessation and alcohol interventions, but has not been found to promote influenza vaccination. In addition, the intervention protocol will be developed based on the World Health Organization's "3C" model, taking into account different age groups, and will be validated in a pre-test, which resulted in a reasonable and feasible proactive protocol adapted to the context of China's primary healthcare structure. The brief advice given by health workers in between registering vaccine information for vaccinators is simple and easy to implement and can be translated into specific entries in the incentive scheme, which contributes to the implementation and sustainability of the intervention.

# VI. Indicators expected to be met by the study

### 1. Theoretical refinement

This study will provide an empirical basis for expanding the application of brief verbal intervention to vaccination, and will refine and complement the World Health Organization's "3C" model of vaccine hesitancy based on the set of factors that influence influencing influenza vaccination.

### Academic conference

This study will refine an existing scoping review of influenza vaccine influencing factors through team member brainstorming, stakeholder co-development, and expected participation in academic conferences in public health, health services research, or vaccine-related fields, with one presentation at the conference.

### Academic paper

This study anticipates the publication of 2 papers in peer-reviewed SCI academic journals, specifically the research design protocol (Protocol) for this study, and the development and validation of the Brief Verbal Intervention in the field of influenza vaccines (results of a randomized controlled trial).

# VII. Supporting conditions for research

## (i) Research conditions

**Implementation Science Methodology:** Prof. Xu Dong, the supervisor of this research project, received his Ph.D. in Global Health (Implementation Science) from the University of Washington, and is currently the head of Acacia Lab for Implementation Science (Acacia Lab for IS), and co-editor-in-chief of the prestigious international journal Implementation Science Communication. He is currently the head of Acacia Lab for Implementation Science (Acacia Lab for IS) and co-editor-in-chief of Implementation Science Communication, a leading international journal in the field of implementation science. He has taught the course "Design and Methods of Implementation Research" to study members to help understand and master theories, models and frameworks commonly used in implementation science, and this study utilizes the CFIR and RE-AIM frameworks as theoretical references for the design of interview outlines and the collection of outcome indicators.

**Site and resource provision:** The researcher's team conducted the Primary heAlth Care quAlity Cohort In ChinA (ACACIA) project, which selected seven representative provinces in China, namely Guangdong, Hunan, Guizhou, Sichuan, Gansu, Shaanxi and Inner Mongolia, to assess the quality of health services in 1,226 primary care organizations across the country, Shaanxi and Inner Mongolia provinces, and selected 1,226 primary care organizations nationwide to conduct health service quality assessment. In the project, we have established cooperative relationships with local health departments and primary care structures, and have already provided interview subjects and observation sites for this study, and are in the process of negotiating for the provision of study sites for both the pre-test and the formal trial.

**Multidisciplinary Perspectives on Viewing and Guiding:** Extended by the ACACIA program partners, nine university team project participants formed the Acacia Labs Collaborative Network, including Southern Medical University, Guizhou Medical University, Inner Mongolia Medical University, Lanzhou University, Sun Yat-sen University, Xi'an Jiaotong University, Sichuan University, Central South University, and Central South University. The collaborative network encompasses a wide range of disciplines, including evidence-based medicine and guideline research, healthy aging, health economics, maternal and child health, and health policy, all of which can provide perspectives, research content, and methodological guidance on how to approach the same issue from different disciplinary perspectives.

## (ii) Project workload

**Preparation phase (2023.04-2023.09):** retrieve and improve the scoping review, form a set of influencing factors of influenza vaccine, prepare interview outlines, project briefs and examples for stakeholder co-development, write a research proposal, organize the research program and specific steps, and initially form a Brief Verbal Intervention line proposal based on the set of influencing factors and the "3C" model to make it more reasonable and feasible. Based on the set of influencing factors and the “3C” model, we initially formed the Brief Verbal Intervention protocol, and at the same time, fully absorbed the opinions of intervention practitioners and vaccinators to improve it and make it more reasonable and feasible;

**Pilot phase (2023.08-2023.10):** list in advance the list of research details that need to be clarified during the pre-test, contact and confirm the selection of medical institutions where the pre-test can be carried out, publish the announcement of the recruitment of investigators, and send a total of 3 researchers and core members of the team to the 2 pilot medical institutions to carry out the pre-test for a period of 1 week in full accordance with the steps in the formal trial, collect the data and obtain appropriate answers to the question list, complete the revision of the study plan and submit it. data and obtain appropriate answers to the list of questions, and complete the revision of the study proposal and submit it for publication.

**Formal trial phase (2023.11-2023.02):** according to the sampling plan to determine the six medical institutions used to carry out the field, to provide three investigators for each institution, in the sample size calculation to obtain the 526 research subjects in each city under the allocation of each institution need to recruit 88 vaccinators who meet the criteria of the natatorium enrollment, in advance of the six health care institutions to carry out training for the implementation of the intervention, in the 14 days before the official trial to test whether the intervention is properly implemented, the investigators need to collect information from the vaccinators, medical staff of the baseline characteristics of the questionnaire, vaccine attitudes, and influenza and influenza vaccine awareness survey of the three tables in a timely manner, the researchers from the health care institutions information system to export the required data, and at the same time, arrange for quality control staff to ensure that the entire process of the study is completed in a high quality.

**Data collation and analysis phase (2023.03-2023.08)**: exporting and cleaning the data on the REDCap data management system, followed by descriptive statistical analysis and relevant modeling, analyzing the results of the study and writing the article.

## (iii) Requirements

The categories of expenses to be incurred for this study include expert consulting fees, investigator-related expenses, research subject-related expenses, and article publication expenses, totaling RMB 142,970,000.

1. **Consultancy fees for experts, total RMB 1,000**

For this study, 20 experts will be invited to conduct the interviews and each expert will provide RMB 50 in lost wages or an equivalent gift, totaling 20 people× 50 (RMB /person) = RMB 1,000.

1. **Investigator-related costs, totaling RMB 78,000**

This study anticipates a formal trial in 6 healthcare facilities with 3 investigators per healthcare facility, i.e., a total of 18 investigators will be recruited, with priority given to recruiting the university student population locally, with 30% (6) expected to be recruited locally and 70% (12) needing to be recruited from the field.

Printing costs: Information with identifying information, research project dependent topics and units needs to be produced in advance for all researchers and investigators, totaling 25 people× 5 (RMB /person) = RMB 125.

Labor cost: RMB 50 for completing data collection for 1 research subject based on collecting all the data needed for the study for 1 research subject, totaling 1,128 according to the sample size× 50 (RMB /seat) = RMB 56,400.

Package fee: the investigators are provided with meals and in-town transportation subsidies using a lump-sum system (RMB 60/person), and the field investigators' transportation and lodging costs are reimbursed using a reimbursement system, with an estimated round-trip transportation cost of RMB 300/person and lodging costs of RMB 100/person/day (with an estimated survey period of 14 days), for a total of 18 people × 60(RMB/person) + 12× 300(RMB/person) + 12× 14× 100(RMB/person) /day) = RMB 21,480.

1. **Costs related to research subjects, totaling RMB 23,970**

This study will give each enrolled study participant a small gift (RMB 15/person), and RMB 300 for courier delivery of the small gift to the site where it will be carried out, for a total of 1,578 people× 15(RMB /person) + 300 = RMB 23,970.

1. **Costs for publication of articles, totaling RMB 40,000**

This study anticipates 2 research proposals in SCI journals for a total of 2× 20,000 (RMB /paper) = RMB 40,000.

# Appendix I List of issues to be identified for pre-testing

1. **Is the brief speech line intervention program feasible and reasonable? Locally relevant?**

Is the current active line program, which requires asking medical staff who conduct pre-testing of healthcare facilities to register vaccination information, too long? Do the key points make sense? Is it consistent with local presentation conventions?

1. **Is the training conducted for medical staff effective and feasible?**

The current program is as follows: ① Conduct meeting training for medical staff in batches (taking into account the need to have medical staff at all times), the training content is a. Introduce the criteria for the inclusion of the study population; b. Introduce the focus and key points of the three categories of population corresponding to the active lines of the short speech intervention, and distribute paper versions of the active lines form; c. Explain that the quality control measures of the intervention include the monitoring of the site before the first 14 days, the mid-term sampling (specifically, asking whether the study population heard the mention of influenza vaccine and remembered key words during the registration of vaccination information). for asking the study participants whether they heard the medical staff mention the influenza vaccine and the key words they remembered when registering the vaccination information)

1. **Is the number of three investigators per healthcare organization appropriate? How should each investigator's path of action and responsibilities be assigned?**

The current protocol is: one investigator assists the nurse at the triage desk in recruiting study participants by finding out the purpose of the people coming to the healthcare facility and indicating that they have been recruited by marking their number on the registration paper and placing a sticker on their clothing; the two investigators each observe the marked people in the holding area, go to a brief introduction of the study and self-introduction, and collect the data. The two investigators each observed the tagged persons in the observation area, went to briefly introduce the study and themselves, and collected data.

1. **Time period for recruiting study participants to enrollment? Is recruitment always at the triage desk? Or at 20-minute intervals? (Taking into account the peaks in the number of vaccinators coming to the health facility and the limited number of investigators)**

The current program is as follows: Recruitment into the group begins at 9:00-9:20 a.m. with a 20-minute interval, continues at 9:40-10:00 a.m. with a 20-minute interval, 10:20-10:40 a.m. with a 20-minute interval, and 11:00-11:20 a.m.; Recruitment into the group begins at 15:00-15:20 p.m. with a 20-minute interval, 15:40-16:00 p.m. with a 20-minute interval, 16:20-16:40 a.m. with a 20-minute interval, and 17:00-17:20 a.m. with a 20-minute interval. Recruitment will continue at 20-minute intervals from 15:00 to 15:20, and at 20-minute intervals from 15:40 to 16:00; recruitment will continue at 20-minute intervals from 15:00 to 16:40, and at 20-minute intervals from 17:00 to 17:20.

That is to say, there are four recruitment entry periods in the morning: 9:00-9:20, 9:40-10:00, 10:20-10:40 and 11:00-11:20, and four recruitment entry periods in the afternoon: 15:00-15:20, 15:40-16:00, 16:20-16:40 and 17:00-17:20.

1. **The time taken to collect all the data from one research participant will be? In what format will the research participant fill out the questionnaire?**

The current program is as follows: the investigator first obtains informed consent (electronic signature) from the research subject, and then asks the research subject (or accompanying person) to scan the QR code of the questionnaire to fill it out using a smartphone, with the investigator assisting and answering questions, and then distributing a small gift after completion; the estimated length of the whole process is 20 minutes.

# Appendix II Data collection form for medical personnel

**Data collection form for medical personnel**

Dear medical personnel:

Hello!

To improve influenza vaccination rates, this study aims to develop and validate a novel intervention, the "Brief Verbal Intervention", in which healthcare workers responsible for registering vaccination information perform the Brief Verbal Intervention (speaking an active line) when registering other vaccination information, and to test the effectiveness of this intervention in a randomized controlled trial. The effectiveness of the intervention will be tested in a randomized controlled trial. Your organization, as one of the sample organizations, now needs to collect basic information about vaccination-related medical staff, their attitudes toward the vaccine, and their knowledge of influenza and the influenza vaccine. It is not a matter of right or wrong answers, so please answer as you see fit. All data collected will be used for research purposes only.

Please select the option that matches your situation according to the questions below, all are single choice if not otherwise indicated.

Thank you for your support and cooperation in this study!

Influenza Vaccine Brief Verbal Intervention Program Team

October 2023

**I. Basic personal information**

1. Numbering:
2. Gender: ①Male ②Female
3. Age: ①＜30 ②30~39 ③40~49 ④≥50
4. Educational attainment:

①High school and below ②Junior college ③College ④University undergraduate ⑤Graduate and above

1. Where the medical institution is located: set the option according to the randomly selected sample of institutions
2. Position: ①Department Head ②Public Health Physician ③Nurse ④Other ______
3. Title: ①No title ②Junior ③Intermediate ④Associate senior ⑤Full senior
4. Work experience: ①＜ 1 year ② 1~ 5 years ③ 5~ 10 years ④ ≥ 10 years
5. Whether or not I have received the flu vaccine:

①Basically once a year ②Began to get vaccinated once a year in the last 3 years ③Not vaccinated against influenza

1. Whether or not family members are vaccinated against the flu:

①Basically once a year ②Began to get vaccinated once a year in the last 3 years ③Not vaccinated against influenza

1. Population categories for influenza vaccination include (multiple choice)

①Children ②Parents ③Others _______

**II. General Vaccine and Influenza Vaccine Attitudes**

| **"3C"**  **model dimension** | **Variable** | **Questionnaire entry** | **Options** |
| --- | --- | --- | --- |
| **For vaccines in general, are there barriers to vaccination?** | | | |
| **Confidence** | **Trust vaccine** | Overall, how much do you believe in vaccines? | ①Not at all - ④Very much |
| **Safety** | In general, do you think vaccines are safe? | ①Not at all - ④Very much |
| **Validity** | In general, do you think vaccines are effective? | ①Not at all - ④Very much |
| **Complacency** | **Necessity** | In general, do you think vaccines are necessary? | ①Not at all - ④Very much |
| **Significance** | In general, do you think vaccines are important? | ①Not at all - ④Very much |
| **Convenience** | **Convenience** | In general, do you find vaccinations convenient? | ①Not at all - ④Very much |
| **Affordability** | In general, do you think vaccines are affordable? | ①Not at all - ④Very much |
| **For the flu vaccine, are there barriers to vaccination?** | | | |
| **Confidence** | **Trust vaccine** | How much do you believe in vaccines for the flu? | ①Not at all - ④Very much |
| **Safety** | For the flu vaccine, do you think it is safe? | ①Not at all - ④Very much |
| **Validity** | For the flu vaccine, do you think it is effective? | ①Not at all - ④Very much |
| **Complacency** | **Necessity** | For the flu vaccine, do you think it is necessary? | ①Not at all - ④Very much |
| **Significance** | For the flu vaccine, do you think it is important? | ①Not at all - ④Very much |
| **Convenience** | **Convenience** | For the flu vaccine, do you think it is convenient to get vaccinated? | ①Not at all - ④Very much |
| **Affordability** | For the flu vaccine, do you think it is affordable to get it? | ①Not at all - ④Very much |

**III. Knowledge Questionnaire on Influenza and Influenza Vaccine**

1. What are the usual symptoms of having the flu? (Multiple choice)

①Acute onset, fever (up to 39-40℃)

② Joint pain, fatigue, loss of appetite

③Vomiting, diarrhea

④ Mild influenza often behaves similarly to the common cold, but its fever and systemic symptoms are more pronounced.

⑤ In severe cases, a variety of complications such as viral pneumonia, secondary bacterial pneumonia, acute respiratory distress syndrome, and shock may occur.

1. Flu season is mostly in?

①Winter and spring ②Spring and summer ③Summer and fall ④Fall and winter ⑤Unknown

1. Influenza is spread by? (Multiple choice)

① airborne droplet transmission ② direct or indirect contact with mucous membranes in the mouth, nose, eyes, etc.

③Bloodborne ④Unknown

1. Ways to prevent the flu are? (Multiple choice)

①Vaccinate against influenza ②Wash your hands often

③ Avoid going to crowded places as much as possible during the influenza epidemic season.

1. What is the recommended frequency of influenza vaccination?

① Vaccination once a year ② Vaccination twice a year

③Vaccination every two years ④Lifetime vaccination

1. What is the best time to get the flu vaccine?

①September and October each year ②2-3 months before a flu epidemic

③Vaccination during an influenza epidemic ④After an influenza epidemic

1. Priority recommendations for influenza vaccination are given to? (Multiple choice)

①Medical staff ②Elderly people aged 60 and above ③Patients with chronic diseases

④Pregnant women ⑤Children between 6 and 59 months of age ⑥Family members of infants under 6 months of age

(vii) Vulnerable people and employees of nursing homes, long-term care facilities, welfare homes, and other crowded places

⑧ key place populations (child care institutions, primary and secondary schools, places of supervision, etc.)

1. Please judge the following statements (correct/incorrect)

| Statement | Judgement |
| --- | --- |
| 8.1 Influenza vaccination is voluntary and self-funded in most parts of China. | ①Right ②Wrong |
| 8.2 Side effects may occur after influenza vaccination, but they are usually mild and usually go away on their own within a few days, with severe reactions rarely occurring. | ①Right ②Wrong |
| 8.3 Influenza vaccination significantly reduces the risk of influenza and serious complications in vaccinated individuals. | ①Right ②Wrong |
| 8.3 You won't get the flu if you get the flu vaccine. | ①Right ②Wrong |
| 8.4 For influenza, all populations are universally susceptible | ①Right ②Wrong |
| 8.5 Influenza is an acute respiratory infectious disease caused by influenza viruses, which are antigenically labile and spread rapidly, causing seasonal epidemics every year. | ①Right ②Wrong |
| 8.6 Healthy adults should also be vaccinated against influenza | ①Right ②Wrong |

# Appendix III Data collection form for vaccinated persons

**Data collection form for vaccinated persons**

Dear Madam/Sir:

Hello!

To improve influenza vaccination rates, this study aims to develop and validate a novel intervention, the "Brief Verbal Intervention", in which healthcare workers responsible for registering vaccination information perform the Brief Verbal Intervention (speaking an active line) when registering additional vaccination information, and to test the effectiveness of this intervention in a randomized controlled trial. The effectiveness of the intervention is tested in a randomized controlled trial. It is now necessary to collect basic information about the vaccinators, their attitudes towards the vaccine and their knowledge of influenza and the influenza vaccine. Answers are not right or wrong, please answer as you see fit, and all data collected will be used for research purposes only.

Please select the option that matches your situation according to the questions below, all are single choice if not otherwise indicated.

Thank you for your support and cooperation in this study!

Influenza Vaccine Brief Verbal Intervention Program Team

October 2023

**I. Basic personal information**

1. Numbering:
2. Are you a vaccinator or a companion: ①Vaccinator ②Companion

(Design logical jumps, e.g., choose ①, jump to question 3; e.g., choose ②, jump to question 2)

1. Are you a (which kinship) of a vaccine recipient?

①Father or mother ②Son or daughter ③Other _______

1. Gender: ①Male ②Female
2. Age of the accompanying person: (This question does not appear when ① is selected for question 2)

① 6~23 months old infants and toddlers (under 2 years old) ② 2-5 years old children ③ 6-14 (elementary and middle school students)

④15-17 (high school students) ⑤18-39 ⑥40-49 ⑦50-59 ⑧Elderly people aged 60 and above

1. Age of the vaccinated person:

①6~23 months old infants and toddlers (under 2 years old) ②Children 2-5 years old ③6-14 (elementary and middle school students)

④15-17 (high school students) ⑤18-39 ⑥40-49 ⑦50-59 ⑧Elderly people aged 60 and older

1. Domicile: ① Rural ② Urban
2. Accompanying person's literacy: (When ① is selected in question 2, this question does not appear)

①High school and below ②Junior college ③College ④University undergraduate ⑤Graduate and above

1. Literacy of vaccinators:

①High school and below ②Junior college ③College ④University undergraduate ⑤Graduate and above

1. Occupation of the accompanying person: (This question does not appear when ① is chosen in question 2)

①Farmers ②Workers ③White-collar workers ④Civil servants ⑤Self-employed ⑥Others ________

1. The annual personal income of the accompanying person:

① <20,000 ② 20,000-50,000 ③ 51,000-100,000 ④ More than 100,000

1. Do you consider the health status of the vaccinated person to be: (This question does not appear when ① is chosen for question 2)

①very good ②better ③average ④worse ⑤very poor

1. Self-assessment of health:

①very good ②better ③average ④worse ⑤very bad

1. Frequency of cold symptoms in vaccinated individuals:

① once a week ② once a month ③ once every two months ④ once every six months ⑤ once a year

1. Whether the vaccinated person has a history of influenza (as diagnosed by a physician):

① Never infected ② Infected once ③ Infected twice ④ Infected 3 times or more

1. Whether the vaccinated person has a chronic underlying disease:

①None ②Cardiovascular disease ③Chronic obstructive pulmonary disease (COPD)

④Diabetes ⑤Other ________

1. Whether the vaccinated person has been vaccinated against influenza before (not counting this time):

①never vaccinated ②vaccinated once ③vaccinated twice ④vaccinated 3 times or more

1. Whether the vaccinated person has ever been vaccinated with the New Crown vaccine:

① Never received ② Received 1 injection ③ Received 2 injections ④ Received 3 injections

1. During this pre-vaccination information enrollment session, did the medical staff hear any mention of the flu vaccine""

Yes ②No

1. What are some of the key words that stand out to you in words referring to the flu vaccine:

(This question does not appear when ② is chosen for question 19)

_______________________________________________

**II. General Vaccine and Influenza Vaccine Attitudes**

| **"3C"**  **model dimension** | **Variable** | **Questionnaire entry** | **Options** |
| --- | --- | --- | --- |
| **For vaccines in general, are there barriers to vaccination?** | | | |
| **Confidence** | **Trust vaccine** | Overall, how much do you believe in vaccines? | ①Not at all - ④Very much |
| **Safety** | In general, do you think vaccines are safe? | ①Not at all - ④Very much |
| **Validity** | In general, do you think vaccines are effective? | ①Not at all - ④Very much |
| **Complacency** | **Necessity** | In general, do you think vaccines are necessary? | ①Not at all - ④Very much |
| **Significance** | In general, do you think vaccines are important? | ①Not at all - ④Very much |
| **Convenience** | **Convenience** | In general, do you find vaccinations convenient? | ①Not at all - ④Very much |
| **Affordability** | In general, do you think vaccines are affordable? | ①Not at all - ④Very much |
| **For the flu vaccine, are there barriers to vaccination?** | | | |
| **Confidence** | **Trust vaccine** | How much do you believe in vaccines for the flu? | ①Not at all - ④Very much |
| **Safety** | For the flu vaccine, do you think it is safe? | ①Not at all - ④Very much |
| **Validity** | For the flu vaccine, do you think it is effective? | ①Not at all - ④Very much |
| **Complacency** | **Necessity** | For the flu vaccine, do you think it is necessary? | ①Not at all - ④Very much |
| **Significance** | For the flu vaccine, do you think it is important? | ①Not at all - ④Very much |
| **Convenience** | **Convenience** | For the flu vaccine, do you think it is convenient to get vaccinated? | ①Not at all - ④Very much |
| **Affordability** | For the flu vaccine, do you think it is affordable to get it? | ①Not at all - ④Very much |

**III. Knowledge Questionnaire on Influenza and Influenza Vaccine**

1. What are the usual symptoms of having the flu? (Multiple choice)

①Acute onset, fever (up to 39-40℃)

② Joint pain, fatigue, loss of appetite

③Vomiting, diarrhea

④ Mild influenza often behaves similarly to the common cold, but its fever and systemic symptoms are more pronounced.

⑤ In severe cases, a variety of complications such as viral pneumonia, secondary bacterial pneumonia, acute respiratory distress syndrome, and shock may occur.

1. Flu season is mostly in?

①Winter and spring ②Spring and summer ③Summer and fall ④Fall and winter ⑤Unknown

1. Influenza is spread by? (Multiple choice)

① airborne droplet transmission ② direct or indirect contact with mucous membranes in the mouth, nose, eyes, etc.

③Bloodborne ④Unknown

1. Ways to prevent the flu are? (Multiple choice)

①Vaccinate against influenza ②Wash your hands often

③ Avoid going to crowded places as much as possible during the influenza epidemic season.

1. What is the recommended frequency of influenza vaccination?

① Vaccination once a year ② Vaccination twice a year

③Vaccination every two years ④Lifelong vaccination

1. What is the best time to get the flu vaccine?

①September and October each year ②2-3 months before a flu epidemic

③Vaccination during an influenza epidemic ④After an influenza epidemic

1. Priority recommendations for influenza vaccination are given to? (Multiple choice)

①Medical staff ②Elderly people aged 60 and above ③Patients with chronic diseases

④Pregnant women ⑤Children between 6 and 59 months of age ⑥Family members of infants under 6 months of age

(vii) Vulnerable people and employees of nursing homes, long-term care facilities, welfare homes, and other crowded places

⑧ key places and people (child care institutions, primary and secondary schools, places of supervision, etc.)

1. Please judge the following statements (Right/Wrong)

| Statement | Judgement |
| --- | --- |
| 8.1 Influenza vaccination is voluntary and self-funded in most parts of the country | ①Right ②Wrong |
| 8.2 Side effects may occur after influenza vaccination, but they are usually mild and usually go away on their own within a few days, with severe reactions rarely occurring. | ①Right ②Wrong |
| 8.3 Influenza vaccination significantly reduces the risk of influenza and serious complications in vaccinated individuals | ①Right ②Wrong |
| 8.3 You won't get the flu if you get the flu vaccine | ①Right ②Wrong |
| 8.4 For influenza, all populations are universally susceptible | ①Right ②Wrong |
| 8.5 Influenza is an acute respiratory infectious disease caused by influenza viruses, which are antigenically labile and spread rapidly, causing seasonal epidemics every year. | ①Right ②Wrong |
| 8.6 Healthy adults should also be vaccinated against influenza | ①Right ②Wrong |

# Appendix IV Informed consent

**Informed consent**

Honorable Participants:

You will be invited to participate in a study led by Xiaoshan Chen (13066948007) at the School of Health Administration, Southern Medical University. This is a study of the use of the Brief Verbal Intervention to promote influenza vaccination, which will take place over a period of 4 months. The project is funded by the Swiss Agency for Development and Cooperation (SDC). You are invited to join this study as you are a voluntary participant and are eligible.

This informed consent form gives you information to help you decide whether or not to participate in this study. Your participation in this study is completely voluntary. This study has been reviewed by the Biomedical Ethics Committee of Southern Medical University.

Please read this informed consent form carefully and feel free to ask any questions you may have to the investigator in charge of the study.

**I. Background of the study**

Influenza (flu) continues to pose a major threat to public health and has become a major focus of our policy attention. Vaccination is currently the most effective measure against influenza and can effectively prevent influenza infection and related complications. Current data show that vaccination rates in China are low, and the factors influencing vaccination can be summarized in the "3C" model theory (three dimensions of trust, complacency, and convenience, including perceived vaccine safety, efficacy, necessity, importance, affordability, etc.). "Brief verbal intervention (BVI) is a technique in which a healthcare professional addresses a specific issue with a health service recipient in a short period of time through brief advice or counseling. No studies have been found exploring the role of brief verbal intervention in vaccination centers as an intervention modality to increase vaccination rates. The sustainability, ease of routine operation, and potential effectiveness of brief verbal interventions as an innovative modality are expected to help enrich existing vaccination interventions. In this study, we developed the Brief Verbal Intervention protocol for three population groups to address factors influencing influenza vaccination, and then tested the effectiveness of this intervention using a two-group, cluster-randomized controlled trial.

**II. Purpose of the study**

The goal of this study will be to develop and validate the Brief Verbal Intervention to enhance influenza vaccination rates.

**III. Research process**

If you agree to participate in this study, during the course of the study you will participate in interviews or be randomly assigned to either the Brief Verbal Intervention group for influenza vaccination, or the control group (routine process) and will be required to fill out the data information to record your data in a timely manner on-line at REDCap (REDCap system).

If you have any concerns about any of the content, please feel free to discuss them with us. This research does not involve private topics, and the information is only collected through Red Hat's systems, and your personal information will be kept confidential throughout.

**IV. Risks or discomfort**

This study poses no risk, but will require you to spend some time participating in an interview or brief verbal intervention.

**V. Possible benefits**

Your participation in the program can be beneficial in enriching your knowledge about the flu and its vaccine.

**VI. Other forms of therapeutic intervention**

We will not give you any other interventions or treatments other than taking part in this study.

**VII. Privacy issues**

If you decide to take part in this study, your personal information is confidential. All information will be confidential to you. For example, your information will be identified by the study number number and not by your name. Information that identifies you will not be disclosed to anyone outside the research team unless you give your permission. Study materials (written or otherwise recorded) will be destroyed 6 years after the study is completed. All study members and the study sponsor are asked to keep your identity confidential. Your file will be accessible only to the researchers. To ensure that the research is conducted in accordance with the regulations, members of the government administration or the ethical review committee are required to have access to your personal data at the research unit when necessary. When the results of the study are published, your personal data are kept confidential.

**VIII. possible costs of participation in the study**

There will be no cost to you for participating in this study.

**IX. study of compensation for related damage**

If you are harmed as a result of your participation in this study: If you incur damages related to this study during the course of the study, SCMS will provide free treatment and/or appropriate compensation (treatment will be provided by SCMS).

**X. Freedom to withdraw:**

As a participant, you can keep informed about information materials and research progress related to this study and voluntarily decide whether to (continue) participate or not to (continue) participate.

**XI. Contact information:**

If you have questions related to this study, or if you experience any discomfort or injury during the study, or have questions about this study, you maycontact **Xiaoshan Chen at 13066948007.**

**If you have any questions related to the rights and interests of subjects during your participation in the study, you can contact the Biomedical Ethics Committee of Southern Medical University, Tel: 020-61647452, e-mail: wyf2015@smu.edu.cn**

**Informed consent signature:**

I have read this informed consent form and my researcher (signature) has explained the purpose, content, risks and benefits of this study to me in detail and answered all the questions I have asked, I understand this study and I volunteer to participate in this study. I have signed the informed consent form.

Subject's signature: _________________________

Date: ______ _year ________ month ________ day

(*Note: Electronic signatures have the same legal effect. The signature of a witness is required if the subject is illiterate, and the consent of an agent is required if the subject is incapacitated.)*

I have informed the subject of the contents of this informed consent form and explained the purpose, content, risks and benefits of this study to the subject in detail and answered all questions asked by the subject. The subjects signed the informed consent form.

Signature of researcher: ______________

Date: ________ year ________ month ________ day

# Appendix V Outline of medical staff interviews

**Mechanisms, Development and Validation of the Brief Verbal Intervention to Promote Influenza Vaccination Interview Outline**

Basic information collection:

| 1. Are you an ethnic minority? (①Yes ②No) |
| --- |
| 2. What is your approximate age? (①＜ 30 ②30-50 ③≥50) |
| 3. What is your education level? (①Graduate student ②University undergraduate ③College ④Secondary ⑤High school and below) |
| 4. How many years have you worked? (①＜ 1 year ② 1-5 years ③ 5-10 years ④ ≥ 10 years ⑨ Not available) |
| 5. What is your title? (①No title ②Junior ③Intermediate ④Associate senior ⑤Formal senior) |
| 6. What are your job responsibilities? ______ |
| 7. Have I been vaccinated against influenza? (①Yes ②No) |
| 8. Have your family members received influenza vaccination? (①Yes ②No) If yes, which group of people? (children, youth, elderly) |

1. **Introduction (1 question)**

Q1. What do you involve in your daily work related to **influenza vaccination**? (e.g. administration, registration, vaccination, etc.) How do you carry out the work related to influenza vaccination? What do you think about the related work?

1. **Factors influencing influenza vaccination (1 question)**

Q2. **What** do you think affects flu vaccination? How?

(The example below is visible only to the interviewer and can be used as a reminder when the interviewee has no ideas)

| Vaccine or vaccination related | 1. Confidence (confidence): trust in vaccines, trust in vaccine service providers. [b. Introduction of new vaccines or new formulations, or new recommendations for existing vaccines; e. Reliability and/or source of supply of vaccines and/or vaccination equipment; i. Vaccines being developed too quickly (may not be able to guarantee quality); h. Strength of recommendation and/or knowledge base and/or attitudes of health care professionals; a. Risks/benefits (epidemiologic and scientific evidence). b. Risks/benefits (epidemiologic and scientific evidence). c. Risks/benefits (epidemiologic and scientific evidence). d. Risks/benefits (epidemiological and scientific evidence). Concerns about effects include concerns about immediate and long-term effects, known or unknown side effects (effects on fertility, blood clots, likelihood of flu after vaccination)] |
| --- | --- |
| 1. Complacency: The belief that vaccine-preventable diseases are of low risk, that vaccines are useless, and that the health benefits of vaccines do not outweigh the side effects. |
| 1. Convenience: low cost, no/low transportation costs, accessible [c. mode of vaccination; d. design of vaccination planning/delivery model (e.g., routine vaccination program or mass vaccination program); f. convenient and comfortable time and place; g. cost] |
| Internal environment | 1. Resources: manpower (number of nurses in the center, specialized technical staff related to influenza vaccination), space, materials and equipment for influenza vaccination, information system for data storage/management/reporting/analysis, funding, etc. |
| 1. Mechanisms: monetary incentives for meeting flu vaccination targets, honorary titles for flu vaccination champions or champions, and penalties for relatively low flu vaccination. |
| 1. Fit with existing work: integration of influenza vaccination with current clinical work |
| 1. Coordination of communication: form in which nurses receive information related to influenza vaccination (meetings, verbal communication, online communication, etc.), form of training (personalized instruction, self-study through electronic resources, etc.) |
| External environment | 1. Administrative/political/policy, communication and media environment, historical influences |
| 1. Religion (involvement of religious leaders, as decisions about whether to vaccinate also depend on beliefs about religious acceptability; and use of community champions as trusted voices)/gender/socio-economic (cultural contexts of convenience and comfort) |
| 1. Geographic barriers (barriers to identifying or traveling to the vaccination site, and the ability to understand the information and/or use the digital appointment system) Inconvenience of making an appointment, social or psychological barriers |
| 1. Economy: incentives, financing |
| 1. Culture: people's/patients' attitudes toward influenza infection |
| Personal characteristic | 1. Roles: leaders - hospital leaders/administrators, heads of relevant government departments (Health Commission, CDC), implementers - clinicians, nurses, professional and technical staff, vaccinators, other other individuals or teams who can facilitate influenza vaccination |
| 1. Characteristics: opportunity - scope of role (our hospital, same level unit, downward/upward); motivation - leader/nurse is self-conscious, nurse is carrying out at the request of the program; attitudes - personal, family, and/or community member experiences with vaccination, including pain; needs - nurse's personal fulfillment is derived from increased influenza vaccination rates, personal health of vaccinated individuals is dependent on influenza vaccination |
| 1. Knowledge/awareness: influenza vaccine knowledge among vaccinators, vaccine service providers |
| Implementation process | 1. Appointment, payment, vaccination and detention |

1. **Brief verbal interventions (4 questions)**

Q3. **What does** your organization do on a daily basis **to publicize and promote** **influenza vaccination?** (e.g. distribution of promotional materials, etc.) How are these activities carried out? (Frequency, format, effectiveness; target groups)

Q4. In smoking cessation clinics, an extra simple sentence related to asking the respondent to smoke less and the dangers of smoking has been shown to be effective in alleviating and reducing smoking when said by the doctor during the visit. This brief speech program, which we hope to apply to flu vaccinations, makes it possible to say one sentence to increase flu vaccination rates. Do you think the phrase **needs to be said** **by age group**?

Programs for different age groups are listed below:

For the elderly group: the elderly, now many people get the flu, may cause pneumonia, you can today by the way the flu vaccine, Zhong Nanshan academician said that the flu vaccine is good, and the elderly is free, can be insured for a year. The elderly should protect their own bodies, do not have to let the young people worry.

For the younger crowd: many people get the flu nowadays, which can cause pneumonia, discomfort, and interfere with work. You can drop by the flu shot today to lower your chances of getting the flu, and young people get it, too, in one shot.

For children and teenagers, the vaccine is usually brought in by their parents: small children have weaker immune systems and are prone to the flu, which can cause pneumonia, so it is better to get the flu shot. You can drop by today to get your flu shot.

Q5. **Who** do you think would be a better person to saythis? (e.g., nurses who register for vaccines, nurses who administer vaccinations) At what point would it be better to say this?

Q6. **What metrics** do you think can be used to show that this statement does work? (same day immediate flu vaccination/appointment) if it needs to be compared to other programs that promote flu vaccination?

Q7. **What months** do you think would be appropriate for this program? (e.g. month of flu outbreak, month of centralized vaccination for any other vaccines)

Q8. **What other problems do** you think **might be encountered** in using a phrase to promote influenza vaccination?

1. **Closure (1 issue)**

Q9. Is there anything else you would like to talk about regarding flu vaccination or Brief Verbal Intervention programs?
